# Supplementary material for: Sequestration and activation of plant toxins protect the western corn rootworm from enemies at multiple trophic levels
Source: eLife. 2017 Nov 24;6:e29307. doi: 10.7554/eLife.29307 (PMC5701792; doi:10.7554/eLife.29307)
Supplement: Figure 1—source data 1. [file elife-29307-fig1-data1.xlsx]

## Sheet: Figure 1A
	Concentration [ug/g FW]
Diabrotica species	HBOA-Glc	HMBOA-Glc	DIMBOA-Glc	DIM2BOA-Glc	HDMBOA-Glc	MBOA-Glc	DIBOA-Glc	DIBOA	DIMBOA	HDMBOA	HDM2BOA-Glc	MBOA
balteata	2.5237	0	1.23565	5.10256	0	2.24789	0.672986	0.0780554	1.79279	0	0	2.05757
balteata	0.581968	0	0	0.216238	0	6.20582	0	0.0127978	0	0	0	0.166868
balteata	4.10963	0	0	1.03982	0	17.3487	0.223409	0.0236097	0	5.43354	0	0
undecimpunctata	13.1839	3.58558	0	6.12307	0.209343	20.2999	0.140389	0	2.92363	3.558	0	14.9767
undecimpunctata	10.7843	17.3487	4.55093	9.81898	0	15.2525	0.86054	0	0.877089	0	0	3.91656
undecimpunctata	14.6733	15.3353	3.80624	16.4661	2.47681	9.12945	1.92242	0.154732	1.54732	0	0.529563	1.24944
undecimpunctata	5.29563	6.84019	0.501982	0.893638	2.84089	3.17186	0	0	0	0	0	0.00722633
undecimpunctata	13.8735	9.51559	0.981898	3.17186	1.58593	10.1775	0.940526	0	0	0	0	0.143699
undecimpunctata	3.36493	0	0	0.344768	0	3.8614	0	0	0.246854	0	0	1.60524
undecimpunctata	2.8133	0	0	1.66868	0	2.46578	0.247957	0	0	0	0	0
undecimpunctata	5.87484	4.16479	1.76245	2.11549	0	8.88122	1.68247	0	0.261472	0	0	0.628856
virgifera	0.636019	38.6058	11.2854	9.72923	61.7824	50.7612	0.166408	0	0	0	0.220881	0.410605
virgifera	0.142809	0	0	0.347308	27.5814	14.5794	0	0	0	0	0	0.118435
virgifera	0.390123	15.047	0.675745	6.76216	78.8828	6.95359	0	0	0	0	0.22318	0.37263
virgifera	3.75937	0	9.3547	4.43911	221.479	86.4563	0.282709	0	0.137218	0	1.01821	0.823584
virgifera	0.758967	0	0	55.2013	311.67	48.4434	0	0	0.666551	0	1.32161	2.51585

## Sheet: Figure 1B
		Concentration [in ng/larva/h]					Concentration [in ug/g FM larva]				Concentration [in ug/g FM frass]
Replicate	tissue	HDMBOA-Glc	MBOA-Glc		Replicate	tissue	HDMBOA-Glc	MBOA-Glc		Replicate	MBOA	DIMBOA-Glc	HDMBOA-Glc	MBOA-Glc	DIMBOA
1	Exudates	1.2728	5.30405		1	Hemolymph	166.006	26.7367		1	0	0.381898	76.0321	13682	0
2	Exudates	1.31422	6.21484		2	Hemolymph	95.1559	74.7653		2	1145.28	3.13724	92.2678	18999.5	0
3	Exudates	2.73994	4.75042		3	Hemolymph	98.8794	27.1401		3	581.093	1.69584	40.2372	13213.6	0
4	Exudates	0.223019	2.96455		4	Hemolymph	51.6117	109.636		4	186.82	1.46375	49.807	7135.86	79.0161
5	Exudates	6.63959	3.10742		1	gut	0	8.57425		5	430.138	0.634269	35.6401	10128	0
6	Exudates	3.62087	10.7331		2	gut	0	47.506		6	11.1869	0	131.435	5648.04	0
					3	gut	0	3.40653		7	120.005	2.50873	0	11325.2	0
					4	gut	8.19168	4.51886
					5	gut	0	0.778635
					1	muscles	10.0672	23.6371
					2	muscles	0	3.54557
					3	muscles	5.43354	2.41006
					4	muscles	11.0601	11.5173
					5	muscles	5.59903	8.50473
					6	muscles	0	15.3178
					7	muscles	0	1.17259
					8	muscles	0	0

## Sheet: Figure 1C
Replicate	Organism	Plant genotype	HDMBOA-Glc	DIMBOA-Glc	MBOA-Glc	MBOA	DIM2BOA-Glc	HMBOA-Glc	DIMBOA	DIBOA-Glc	HBOA-Glc	HDM2BOA-Glc	HM2BOA-Glc
20	Plant	B73	232.286	228.466	0.294765	0.00108306	190.405	463.569	0.152488	5.67984	7.63922	39.4402	85.5081
17	Plant	B73	235.67	282.598	1.74763	0.0122347	191.669	422.163	0.0324692	13.551	6.10059	16.0609	32.0551
23	Plant	B73	223.503	289.772	0	0	115.842	257.432	0	56.7975	14.3994	14.6786	18.821
15	Plant	B73	239.822	288.64	1.54171	0.00977998	195.258	434.053	0.0321579	12.5228	5.5727	16.7126	32.485
21	Plant	B73	271.213	336.281	0.246221	0	222.182	437.26	0.103429	24.5899	6.8719	22.7545	60.6975
13	Plant	B73	223.145	326.185	1.73027	0	134.16	484.696	0.0679767	13.6912	6.51129	7.89797	18.3125
19	Plant	B73	212.981	294.188	1.07738	0	120.824	422.964	0.0427777	11.0697	4.6075	8.21859	17.783
14	Plant	B73	245.769	372.3	2.8204	0.00104091	172.736	441.879	0.113066	31.5209	13.8338	11.5124	19.2514
18	Plant	B73	241.063	252.637	1.26471	0.00724611	106.584	403.111	0.030433	13.8043	3.93444	9.22193	14.1863
16	Plant	B73	254.474	249.341	1.07944	0	85.3125	388.253	0.0323719	12.2164	3.66249	7.77268	12.1407
24	Plant	B73	208.853	241.324	0.390171	0.0079738	189.211	383.774	0.109538	8.64572	13.1845	34.7456	60.9834
22	Plant	B73	269.568	304.519	0.52348	0.00343888	219.303	423.458	0.10526	16.6417	13.9212	45.9562	70.3792
5	Plant	BX1	125.964	102.201	0.168924	0.00739871	49.3009	103.591	0	1.01007	3.43088	10.9579	6.91118
12	Plant	BX1	54.9667	22.3646	0	0.00359984	30.8056	20.1934	0	0.430142	4.44443	29.5737	7.97445
8	Plant	BX1	94.1119	118.271	0.0427852	0.00101805	85.1831	101.628	0.0253796	0.804018	2.87444	9.6086	11.8177
10	Plant	BX1	62.8067	20.483	0.00261686	0	35.7919	26.0396	0.0404462	1.27977	6.85775	28.3336	10.1187
7	Plant	BX1	57.8552	13.8973	0.0097962	0.00428361	31.7512	20.5148	0.0195956	0.06452	2.47057	29.9101	9.89965
9	Plant	BX1	71.8981	24.5555	0.0216362	0.00212338	40.192	26.8143	0.0315195	1.70511	7.51599	27.26	10.5246
3	Plant	BX1	140.237	119.755	0.947287	0	54.2508	108.777	0.0189102	2.20356	5.5392	14.9982	6.74592
11	Plant	BX1	66.8314	21.7274	0.011236	0	34.8835	26.3903	0.0303405	1.59792	7.7699	27.5906	10.9623
1	Plant	BX1	84.7394	97.0234	0	0.0128999	69.7132	87.8835	0.0154816	0.829607	1.96896	7.70357	8.19942
6	Plant	BX1	116.984	44.6931	0	0.00414152	24.0552	87.1346	0	0.149491	1.10654	9.9681	3.2508
4	Plant	BX1	124.756	99.2755	0.151597	0.00471229	42.6167	102.304	0	0.878168	2.72316	9.94836	5.97396
26	Larva	B73	104.854	9.29717	52.9576	0	1.2239	31.0773	0.0304509	0	0.457714	1.22231	0.621973
29	Larva	B73	139.984	7.0358	23.7276	0.00930942	0.547206	21.9075	0	0.0440952	0.130988	1.21248	0.261799
36	Larva	B73	59.2941	2.24167	11.3363	0	0.18456	21.8224	0.00320999	0.0718932	0.167675	1.09099	0.535324
28	Larva	B73	79.0169	2.78185	13.0946	0.00933974	0.128145	13.4684	0	0.0527695	0.104635	0.643866	0.118618
25	Larva	B73	150.865	7.50987	28.182	0	0.910498	18.8415	0.00711809	0	0.184863	1.68221	0.68942
30	Larva	B73	85.6688	4.66661	14.8539	0.00757666	0.963919	17.1153	0	0.0621659	0.208789	2.63007	0.385272
35	Larva	B73	57.1246	3.24325	10.7807	0	0.654471	12.9508	0	0.114594	0.185073	1.54121	0.457139
27	Larva	B73	101.367	14.6456	16.9257	0.000921797	0.710797	21.3795	0.00537715	0.0631888	0.0981838	1.23944	0.2937
37	Larva	B73	NA	NA	NA	NA	NA	NA	NA	NA	NA	NA	NA
38	Larva	BX1	10.4525	0.247723	1.30484	0	0.155199	2.07903	0	0	0.214906	0.955135	0.265713
33	Larva	BX1	60.7584	1.85632	5.85793	0	0.623443	9.61476	0	0.038296	0.223162	1.66296	0.336494
31	Larva	BX1	NA	NA	NA	NA	NA	NA	NA	NA	NA	NA	NA
32	Larva	BX1	56.8958	1.78139	2.75524	0.00828319	0.27788	7.10681	0	0	0.270632	1.57673	0.285309
39	Larva	BX1	24.9255	5.65007	3.17595	0	1.69871	10.191	0	0.103479	0.128182	2.43198	0.74001
34	Larva	BX1	89.4028	4.24752	7.4038	0	0.309114	14.954	0.00113203	0.0548139	0.503719	2.00827	0.390358
