# Supplementary material for: Sequestration and activation of plant toxins protect the western corn rootworm from enemies at multiple trophic levels
Source: eLife. 2017 Nov 24;6:e29307. doi: 10.7554/eLife.29307 (PMC5701792; doi:10.7554/eLife.29307)
Supplement: Figure 2—source data 1. [file elife-29307-fig2-data1.xlsx]

## Sheet: Fig 2A
Subject	Treatment	Timing [min ]	MBOA-Glc [ng/g FM]
1	MBOA + Gut	10	63
2	MBOA + Gut	10	73
3	MBOA + Gut	10	67
1	MBOA + Gut	480	132
2	MBOA + Gut	480	422
3	MBOA + Gut	480	169
1	MBOA + Gut	1440	171
2	MBOA + Gut	1440	274
3	MBOA + Gut	1440	177
4	Boiled gut + MBOA	10	0
5	Boiled gut + MBOA	10	0
6	Boiled gut + MBOA	10	0
4	Boiled gut + MBOA	480	0
5	Boiled gut + MBOA	480	0
6	Boiled gut + MBOA	480	0
4	Boiled gut + MBOA	1440	0
5	Boiled gut + MBOA	1440	0
6	Boiled gut + MBOA	1440	0
7	Gut	10	0
8	Gut	10	0
9	Gut	10	0
7	Gut	480	0
8	Gut	480	0
9	Gut	480	0
7	Gut	1440	0
8	Gut	1440	0
9	Gut	1440	0
10	MBOA	10	0
11	MBOA	10	0
12	MBOA	10	0
10	MBOA	480	0
11	MBOA	480	0
12	MBOA	480	0
10	MBOA	1440	0
11	MBOA	1440	0
12	MBOA	1440	0

## Sheet: Fig 2B
Repliate	Subject	Treatment	Timing [min]	Peak area [cps]	Proportion of initial HDMBOA-Glc [%]
1	1	HDMBOA Glc + Plant glucosidase + larvae guts	0	26960.9	100
20	2	HDMBOA Glc + Plant glucosidase + larvae guts	0	18739.7	100
38	3	HDMBOA Glc + Plant glucosidase + larvae guts	0	23168.7	100
50	4	HDMBOA Glc + Plant glucosidase + larvae guts	0	18304.7	100
56	5	HDMBOA Glc + Plant glucosidase + larvae guts	0	16218.9	100
62	6	HDMBOA Glc + Plant glucosidase + larvae guts	0	19071.4	100
4	7	HDMBOA Glc + Plant glucosidase + larvae guts	0	27095.9	100
23	8	HDMBOA Glc + Plant glucosidase + larvae guts	0	27526.3	100
41	9	HDMBOA Glc + Plant glucosidase + larvae guts	0	20431.7	100
53	10	HDMBOA Glc + Plant glucosidase + larvae guts	0	16400.8	100
59	11	HDMBOA Glc + Plant glucosidase + larvae guts	0	12563.8	100
2	1	HDMBOA Glc + Plant glucosidase + larvae guts	60	18136.3	67.2691
21	2	HDMBOA Glc + Plant glucosidase + larvae guts	60	7002.12	37.3652
39	3	HDMBOA Glc + Plant glucosidase + larvae guts	60	13778.8	59.4717
51	4	HDMBOA Glc + Plant glucosidase + larvae guts	60	11036	60.2908
57	5	HDMBOA Glc + Plant glucosidase + larvae guts	60	11554.3	71.2399
63	6	HDMBOA Glc + Plant glucosidase + larvae guts	60	12622.2	66.1839
5	7	HDMBOA Glc + Plant glucosidase + larvae guts	60	21233.1	78.3628
24	8	HDMBOA Glc + Plant glucosidase + larvae guts	60	NA	NA
42	9	HDMBOA Glc + Plant glucosidase + larvae guts	60	14571.5	71.3181
54	10	HDMBOA Glc + Plant glucosidase + larvae guts	60	11644.8	71.0013
60	11	HDMBOA Glc + Plant glucosidase + larvae guts	60	6787.7	54.0256
3	1	HDMBOA Glc + Plant glucosidase + larvae guts	180	6123.97	22.7143
22	2	HDMBOA Glc + Plant glucosidase + larvae guts	180	1423.86	7.59812
40	3	HDMBOA Glc + Plant glucosidase + larvae guts	180	4599.27	19.8512
52	4	HDMBOA Glc + Plant glucosidase + larvae guts	180	5285.57	28.8755
58	5	HDMBOA Glc + Plant glucosidase + larvae guts	180	4541.34	28.0003
64	6	HDMBOA Glc + Plant glucosidase + larvae guts	180	4678.87	24.5334
6	7	HDMBOA Glc + Plant glucosidase + larvae guts	180	8455.23	31.2048
25	8	HDMBOA Glc + Plant glucosidase + larvae guts	180	5058.37	18.3765
43	9	HDMBOA Glc + Plant glucosidase + larvae guts	180	96.143	0.470558
55	10	HDMBOA Glc + Plant glucosidase + larvae guts	180	5187.6	31.6301
61	11	HDMBOA Glc + Plant glucosidase + larvae guts	180	1651.96	13.1485
7	12	HDMBOA Glc + Plant glucosidase	0	25405.2	100
26	13	HDMBOA Glc + Plant glucosidase	0	8626.53	100
44	14	HDMBOA Glc + Plant glucosidase	0	20648.6	100
10	15	HDMBOA Glc + Plant glucosidase	0	22779.8	100
29	16	HDMBOA Glc + Plant glucosidase	0	21590.2	100
47	17	HDMBOA Glc + Plant glucosidase	0	12899.6	100
8	12	HDMBOA Glc + Plant glucosidase	60	22345.6	87.957
27	13	HDMBOA Glc + Plant glucosidase	60	22258.3	100
45	14	HDMBOA Glc + Plant glucosidase	60	18327.7	88.7601
11	15	HDMBOA Glc + Plant glucosidase	60	20521.4	90.0859
30	16	HDMBOA Glc + Plant glucosidase	60	25838.3	119.676
48	17	HDMBOA Glc + Plant glucosidase	60	16204.8	125.623
9	12	HDMBOA Glc + Plant glucosidase	180	14241.1	56.0561
28	13	HDMBOA Glc + Plant glucosidase	180	15588.3	70.0337
46	14	HDMBOA Glc + Plant glucosidase	180	12117	58.6817
12	15	HDMBOA Glc + Plant glucosidase	180	14253.9	62.5726
31	16	HDMBOA Glc + Plant glucosidase	180	14955.8	69.2712
49	17	HDMBOA Glc + Plant glucosidase	180	10253.8	79.4898
13	18	HDMBOA Glc + Larvae guts	0	27915.2	100
32	19	HDMBOA Glc + Larvae guts	0	29021.2	100
14	18	HDMBOA Glc + Larvae guts	60	24678.4	88.4049
33	19	HDMBOA Glc + Larvae guts	60	24872.2	85.7036
15	18	HDMBOA Glc + Larvae guts	180	15012.2	53.7777
34	19	HDMBOA Glc + Larvae guts	180	22815.3	78.6158

## Sheet: Fig 2C
Replicate	Subject	Timing [min]	MBOA [ug/g FW]	MBOA-Glc [ug/g FW]	HDMBOA-Glc [ug/g FW]
1	1	0	0.57528	12.0267	181.611
7	2	0	outlier	13.6416	83.647
13	3	0	0.527465	18.6692	282.815
19	4	0	1.22505	12.2398	225.776
25	5	0	0.732815	26.2678	141.454
31	6	0	2.15516	11.7122	221.758
37	7	0	0.867701	8.48666	211.856
43	8	0	0.50532	11.0219	148.003
2	1	2	0.519413	3.86015	52.1459
8	2	2	2.20267	9.52547	22.3273
14	3	2	0.723755	10.2948	265.803
20	4	2	1.13002	9.34467	198.277
26	5	2	0	28.4201	128.074
32	6	2	2.27897	10.183	181.56
38	7	2	0.835489	9.29903	169.703
44	8	2	0.594808	11.6995	159.211
3	1	10	1.42738	3.54255	27.2043
9	2	10	47.9611	11.0428	11.293
15	3	10	0.528472	13.1096	202.15
21	4	10	5.52933	11.6614	152.673
27	5	10	1.72131	25.8833	43.2143
33	6	10	0.661345	11.0906	131.144
39	7	10	1.90049	7.83045	119.843
45	8	10	1.53307	10.2503	141.167
4	1	30	41.1795	12.1783	36.9214
10	2	30	9.51652	12.5414	5.08716
16	3	30	10.503	14.7441	192.718
22	4	30	3.957	9.90621	76.5295
28	5	30	25.0949	21.956	3.0225
34	6	30	2.07362	9.47776	57.7367
40	7	30	11.6264	8.16046	36.0334
46	8	30	5.72058	9.76447	70.5002
5	1	60	16.4259	13.1513	7.81545
11	2	60	38.5362	9.61158	0.0475267
17	3	60	12.5857	16.8941	124.835
23	4	60	14.8496	9.43835	35.4793
29	5	60	4.59116	15.4782	0.440414
35	6	60	24.5966	6.50135	10.3662
41	7	60	1.38208	6.66465	7.21151
47	8	60	15.218	8.63506	28.3793
6	1	120	15.3076	13.5482	1.36056
12	2	120	1.86827	0.0255999	0.0385386
18	3	120	14.0382	15.9582	45.4775
24	4	120	39.2952	10.5156	9.07643
30	5	120	79.5456	20.2174	0.0406725
36	6	120	13.4544	11.2543	2.08425
42	7	120	NA	NA	NA
48	8	120	44.5094	9.99216	6.47514

## Sheet: Fig 2D
Replicate	Treatment	HDMBOA-Glc [ug/g FM]	MBOA-Glc [ug/g FM]	MBOA [ug/g FM]
2	Control	65.2965	3.49082	0.187433
5	Control	136.045	10.1035	0.188259
7	Control	100.538	4.02313	0.370462
8	Control	80.8024	6.26737	0.305391
1	Infested	76.9095	16.4784	0.603709
3	Infested	105.223	8.53348	0.537912
4	Infested	100.272	4.80377	0.362088
6	Infested	81.3432	6.06177	0.70958
9	Infested	15.8964	5.25175	0.847828

## Sheet: Fig 2E
Replicate	BX treatment	EPN presence	HDMBOA-Glc [ug/ml]			Replicate	BX treatment	EPN presence	MBOA[ug/ml]			Replicate	BX treatment	EPN presence	MBOA-Glc [ug/ml]
4	HDMBOA-Glc	control	11.0767			2	MBOA	control	2.01882			1	MBOA-Glc	Control	0.5111
15	HDMBOA-Glc	control	11.1853			13	MBOA	control	0			2	MBOA-Glc	Control	0.542549
26	HDMBOA-Glc	control	9.51456			24	MBOA	control	5.07864			3	MBOA-Glc	Control	0.302408
37	HDMBOA-Glc	control	9.21831			35	MBOA	control	5.99962			4	MBOA-Glc	Control	0.533788
48	HDMBOA-Glc	control	9.21578			46	MBOA	control	7.70608			5	MBOA-Glc	Control	0.523717
59	HDMBOA-Glc	control	9.44539			57	MBOA	control	6.23681			6	MBOA-Glc	Control	0.520184
5	HDMBOA-Glc	EPN	4.92136			3	MBOA	EPN	0			7	MBOA-Glc	Control	0.538275
16	HDMBOA-Glc	EPN	5.84612			14	MBOA	EPN	1.11743			8	MBOA-Glc	Control	0.481476
27	HDMBOA-Glc	EPN	5.2034			25	MBOA	EPN	0			9	MBOA-Glc	Control	0.563666
38	HDMBOA-Glc	EPN	4.96557			36	MBOA	EPN	5.46965			10	MBOA-Glc	Control	0.509584
49	HDMBOA-Glc	EPN	5.62441			47	MBOA	EPN	7.19759			11	MBOA-Glc	EPN	0.490436
60	HDMBOA-Glc	EPN	5.17939			58	MBOA	EPN	5.34079			12	MBOA-Glc	EPN	0.536478
												13	MBOA-Glc	EPN	0.486985
												14	MBOA-Glc	EPN	0.566356
												15	MBOA-Glc	EPN	0.562905
												16	MBOA-Glc	EPN	0.538824
												17	MBOA-Glc	EPN	0.514709
												18	MBOA-Glc	EPN	0.600707
												19	MBOA-Glc	EPN	0.569498

## Sheet: Fig 2F
HDMBOA-Glc in the medium				MBOA in the medium				MBOA-Glc in the medium
Replicate	Treatment	HDMBOA-Glc [ug/ml]		Replicate	Treatment	MBOA [ug/ml]		Replicate	Treatment	MBOA-Glc [ug/ml]
3	Control	3.46449		1	Control	2.84728		2	Control	6.89556
18	Control	3.35144		16	Control	3.24439		17	Control	6.81837
33	Control	3.34384		31	Control	2.81319		32	Control	6.9009
7	Bacteria	3.12751		5	Bacteria	3.37766		6	Bacteria	6.66023
11	Bacteria	3.12192		9	Bacteria	3.43512		10	Bacteria	6.65512
15	Bacteria	3.03122		13	Bacteria	3.12736		14	Bacteria	6.00982
22	Bacteria	3.01001		20	Bacteria	3.78604		21	Bacteria	6.52779
26	Bacteria	2.94907		24	Bacteria	2.92475		25	Bacteria	6.18519
30	Bacteria	3.1552		28	Bacteria	3.16481		29	Bacteria	6.45042
