# Supplementary material for: Sequestration and activation of plant toxins protect the western corn rootworm from enemies at multiple trophic levels
Source: eLife. 2017 Nov 24;6:e29307. doi: 10.7554/eLife.29307 (PMC5701792; doi:10.7554/eLife.29307)
Supplement: Figure 3—source data 1. [file elife-29307-fig3-data1.xlsx]

## Sheet: Figure 3A
Replicate	Plant genotype	Number of healthy larvae	Number of infected larvae			Replicate	Plant genotype	Number of healthy larvae	Number of infected larvae
1	bx2	3	2			1	bx1	2	2
2	bx1	2	3			2	bx1	2	1
3	Wt	4	1			3	bx1	2	1
4	bx1	4	1			4	bx1	2	2
5	bx1	2	3			5	bx1	1	0
6	Wt	4	1			6	bx1	1	2
7	Wt	4	1			7	bx1	0	1
8	bx2	4	1			8	bx1	3	1
9	bx2	3	2			9	bx1	2	1
10	bx1	1	4			1	B73	2	0
11	Wt	5	0			2	B73	4	0
12	bx1	3	2			3	B73	1	0
13	bx2	4	1			4	B73	4	0
14	bx1	3	2			5	B73	3	1
15	Wt	4	1			6	B73	3	1
16	bx1	4	1			7	B73	2	2
17	bx1	1	4			8	B73	3	1
18	bx2	2	3
19	bx1	4	1
20	Wt	4	1
21	Wt	5	0
22	bx2	3	2
23	bx2	3	2
24	Wt	5	0

## Sheet: Figure 3B
		Number of dead and alive D. virgifera larvae after exposure to EPNs
Replicate	Treatment	Dead	Alive
1	Control	2	1
2	Control	3	0
3	Control	2	1
4	Control	1	1
5	Control	2	1
6	Control	3	0
7	MBOA Glc	2	1
8	MBOA Glc	1	1
9	MBOA Glc	1	2
10	MBOA Glc	1	2
11	MBOA Glc	2	1
12	MBOA Glc	1	2
13	HDMBOA Glc	1	2
14	HDMBOA Glc	1	2
15	HDMBOA Glc	2	1
16	HDMBOA Glc	0	3
17	HDMBOA Glc	0	3
18	HDMBOA Glc	1	2
19	MBOA	1	3
20	MBOA	0	3
21	MBOA	1	2
22	MBOA	2	1
23	MBOA	2	1
24	MBOA	2	1

## Sheet: Figure 3C
		Technical replicate 1		Technical replicate 2		Technical replicate 3
Replicate	Treatment	alive	dead	alive	dead	alive	dead
1	control	55	6	61	8	62	9
2	control	42	4	59	8	60	7
3	control	58	7	66	9	65	10
4	control	47	6	57	8	52	6
5	control	51	5	73	7	52	8
6	control	46	18	62	9	72	16
7	control	62	8	57	8	63	14
8	control	43	5	54	5	47	6
9	control	47	6	49	8	51	5
10	control	46	3	64	7	51	7
11	MBOA-Glc (50ug/ml)	60	10	55	9	70	9
12	MBOA-Glc (50ug/ml)	62	5	76	14	74	14
13	MBOA-Glc (50ug/ml)	65	9	66	7	65	5
14	MBOA-Glc (50ug/ml)	52	7	61	7	75	8
15	MBOA-Glc (50ug/ml)	72	11	56	10	68	7
16	MBOA-Glc (50ug/ml)	57	7	59	7	50	4
17	MBOA-Glc (50ug/ml)	59	10	69	10	64	5
18	MBOA-Glc (50ug/ml)	67	8	73	10	60	8
19	MBOA-Glc (50ug/ml)	60	6	67	8	79	17
20	MBOA-Glc (50ug/ml)	64	8	74	11	54	11
21	HDMBOA-Glc (150ug/ml)	51	17	83	11	54	9
22	HDMBOA-Glc (150ug/ml)	52	5	52	8	63	15
23	HDMBOA-Glc (150ug/ml)	53	8	47	9	34	9
24	HDMBOA-Glc (150ug/ml)	48	6	45	7	44	7
25	HDMBOA-Glc (150ug/ml)	32	10	36	11	45	6
26	HDMBOA-Glc (150ug/ml)	30	17	36	11	45	6
27	HDMBOA-Glc (150ug/ml)	41	8	52	9	50	8
28	HDMBOA-Glc (150ug/ml)	37	9	38	6	23	7
29	HDMBOA-Glc (150ug/ml)	33	11	57	9	21	13
30	HDMBOA-Glc (150ug/ml)	54	13	55	15	57	11
31	MBOA (25ug/ml)	40	11	75	17	25	6
32	MBOA (25ug/ml)	29	13	37	8	44	12
33	MBOA (25ug/ml)	37	10	47	15	50	11
34	MBOA (25ug/ml)	32	12	36	21	60	23
35	MBOA (25ug/ml)	33	28	47	21	65	13
36	MBOA (25ug/ml)	38	20	39	13	32	16
37	MBOA (25ug/ml)	39	12	44	23	37	12
38	MBOA (25ug/ml)	48	9	36	21	37	12
39	MBOA (25ug/ml)	45	26	41	18	13	11
40	MBOA (25ug/ml)	25	11	35	17	51	23

## Sheet: Figure 3D
MBOA-Glu (ug/ml)	RelativeGrowth		HDMBOA-Glu (ug/ml)	RelativeGrowth		MBOA (ug/ml)	RelativeGrowth
0	107.023		0	84.2445		0	99.3067
0	114.681		0	87.7255		0	102.302
0	87.3848		0	115.236		0	94.0654
0	90.912		0	112.794		0	104.326
20.4847	116.714		20	81.3811		13	91.0704
20.4847	106.419		20	85.592		13	89.9889
20.4847	99.3009		20	107.067		13	92.0133
20.4847	87.5437		20	104.513		13	89.5452
30.727	105.752		30	78.4897		20	87.0494
30.727	109.469		30	84.5814		20	84.0544
30.727	83.7941		30	98.5894		20	94.1486
30.727	90.7849		30	100.863		20	93.8991
46.0905	117.159		45	77.9283		30	83.6384
46.0905	106.641		45	86.2096		30	82.335
46.0905	89.482		45	96.0067		30	83.5829
46.0905	90.054		45	93.1434		45	71.7693
69.1358	112.488		70	75.8229		45	66.0566
69.1358	106.514		70	83.8234		45	84.9695
69.1358	83.6988		70	85.8446		45	71.2978
69.1358	85.224		70	83.0093		65	66.9717
103.704	107.499		100	72.4823		65	55.7959
103.704	104.957		100	82.8128		65	76.6223
103.704	90.2447		100	74.0543		65	64.5036
103.704	86.7493		100	79.2757		100	47.31
155.556	112.202		160	66.3064		100	42.7066
155.556	107.658		160	78.0686		100	64.5868
155.556	86.9399		160	59.0638		100	59.0405
155.556	90.7531		160	79.6407		150	29.1459
233.333	111.408		240	57.7163		150	24.7643
233.333	108.167		240	73.549		150	47.7815
233.333	93.8354		240	52.4388		150	43.4553
233.333	85.9867		240	59.0076		220	12.0632
350	105.529		360	29.2231		220	13.533
350	106.8		360	70.0119		220	29.645
350	83.2857		360	47.7788		220	30.2829
350	81.3791		360	62.4605		330	10.0388
						330	10.6489
						330	16.3616
						330	16.0011
