# Supplementary material for: Sequestration and activation of plant toxins protect the western corn rootworm from enemies at multiple trophic levels
Source: eLife. 2017 Nov 24;6:e29307. doi: 10.7554/eLife.29307 (PMC5701792; doi:10.7554/eLife.29307)
Supplement: Figure 4—source data 1. [file elife-29307-fig4-data1.xlsx]

## Sheet: Figure 4A
		Number of choosing nematodes						Number of choosing nematodes
Replicate		Larvae fed on B73	Larvae fed on bx1			Replicate		Larvae fed on B73	Larvae fed on bx1
1	Larvae	3	11			1	Exudates	4	22
2	Larvae	7	8			2	Exudates	2	10
3	Larvae	4	12			4	Exudates	0	3
4	Larvae	2	2			6	Exudates	2	4
5	Larvae	1	11			7	Exudates	0	3
6	Larvae	2	1			9	Exudates	1	1
7	Larvae	0	2			11	Exudates	6	16
8	Larvae	0	3			12	Exudates	1	1
						13	Exudates	1	1
						14	Exudates	4	1
						15	Exudates	1	2
						16	Exudates	0	1
						17	Exudates	7	5
						18	Exudates	1	5
						19	Exudates	1	11
						20	Exudates	0	1
						21	Exudates	0	6
						22	Exudates	7	7
						23	Exudates	1	1

## Sheet: Figure 4B
	Number of choosing nematodes					Number of choosing nematodes					Number of choosing nematodes
Replicate	Exudates of larvae fed on the double mutant	Exudates of larvae fed on the double mutant + MBOA-Glc + HDMBOA-Glc			Replicate	Exudates of larvae fed on the double mutant	Exudates of larvae fed on the double mutant + MBOA-Glc			Replicate	Exudates of larvae fed on the double mutant	Exudates of larvae fed on the double mutant + HDMBOA-Glc
1	2	1			31	11	2			51	3	8
2	2	1			32	10	3			52	3	4
3	0	0			33	12	1			53	4	0
4	1	0			34	0	0			54	7	1
5	1	2			35	0	0			55	3	1
6	0	1			36	20	25			56	1	1
7	6	1			37	14	6			57	0	2
8	3	1			38	29	2			58	8	22
9	3	4			39	40	1			59	2	8
10	0	0			40	21	11			60	1	3
11	2	0			41	22	7			61	0	1
12	0	2			42	22	10			62	2	2
13	2	0			43	18	10			63	1	10
14	0	0			44	7	6			64	2	13
15	0	0			45	45	18			65	14	19
16	3	0			46	29	8			66	1	2
17	10	6			47	4	1			67	6	0
18	7	0			48	15	3			68	4	8
19	3	2			49	45	11			69	1	1
20	1	0			50	47	14			70	4	27
21	6	0								71	1	4
22	0	1								72	2	6
23	1	2								73	2	1
24	3	3
25	2	0
26	2	0
27	2	0
28	5	0
29	3	0
30	1	3
