# Supplementary material for: Sequestration and activation of plant toxins protect the western corn rootworm from enemies at multiple trophic levels
Source: eLife journal article supplement (doi:10.7554/elife.29307), 2017-11-24
Supplement: figures [file elife-29307-figures-v1.pdf]

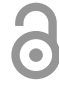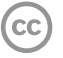

---

## Figures and figure supplements

Sequestration and activation of plant toxins protect the western corn rootworm from enemies at multiple trophic levels

**Christelle AM Robert *et al***

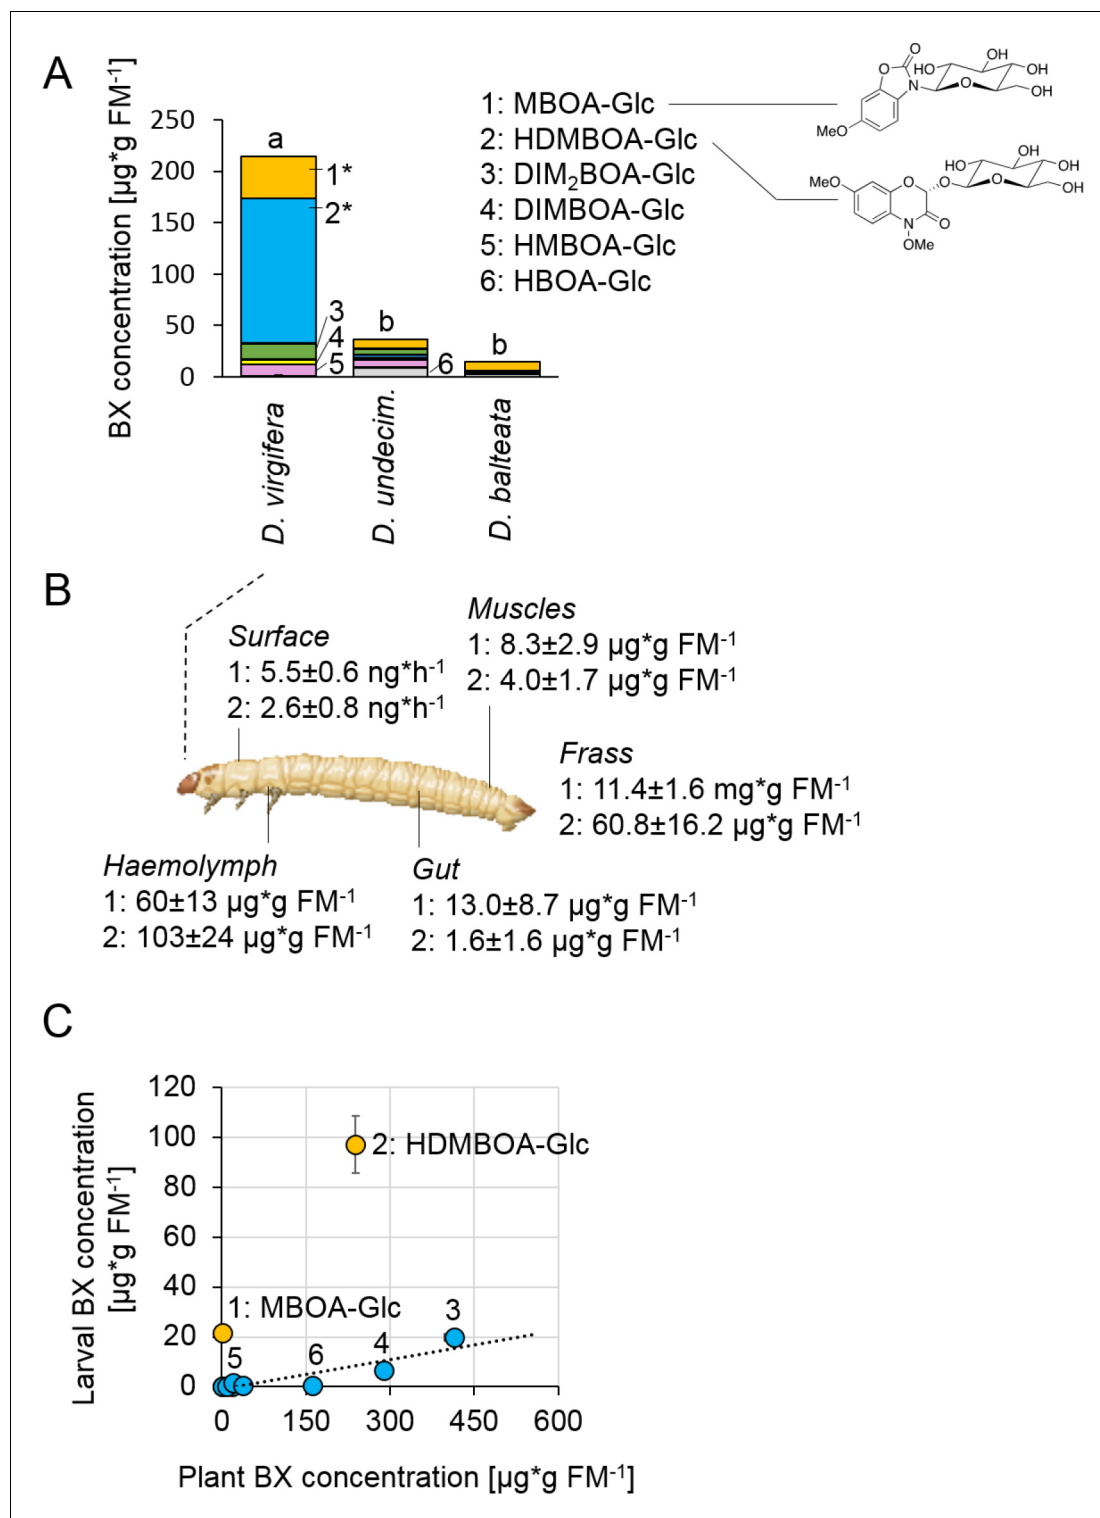

**Figure 1.** *Diabrotica virgifera* specifically and actively sequesters maize benzoxazinoids (BXs) (Figure 1—figure supplements 1–3). (A) BX concentration in larvae of the specialist *D. virgifera*, and the generalists *D. undecimpunctata* (*D. undecim.*) and *D. balteata*. Numbers denote the six most abundant BXs. Stars indicate significant differences between species (one-way ANOVA on transformed data (rank and square root transformations), \* $p < 0.05$ ). (B) BX concentrations in the haemolymph, gut, muscles, exudates (surface), and frass of *D. virgifera* larvae fed on wild-type B73 plants. (C) Correlation between BX concentrations in maize B73 plants and in third instar *D. virgifera* larvae that fed on those plants since hatching. Unlabeled blue dots correspond to other types of BXs. A linear regression between plant and larval concentrations is shown ( $R^2 = 0.8141$ ,  $p = 0.004$ , excl. MBOA-Glc and HDMBOA-Glc). Means  $\pm$  SE are shown. Raw data are available in Figure 1—source data 1.

DOI: <https://doi.org/10.7554/eLife.29307.003>

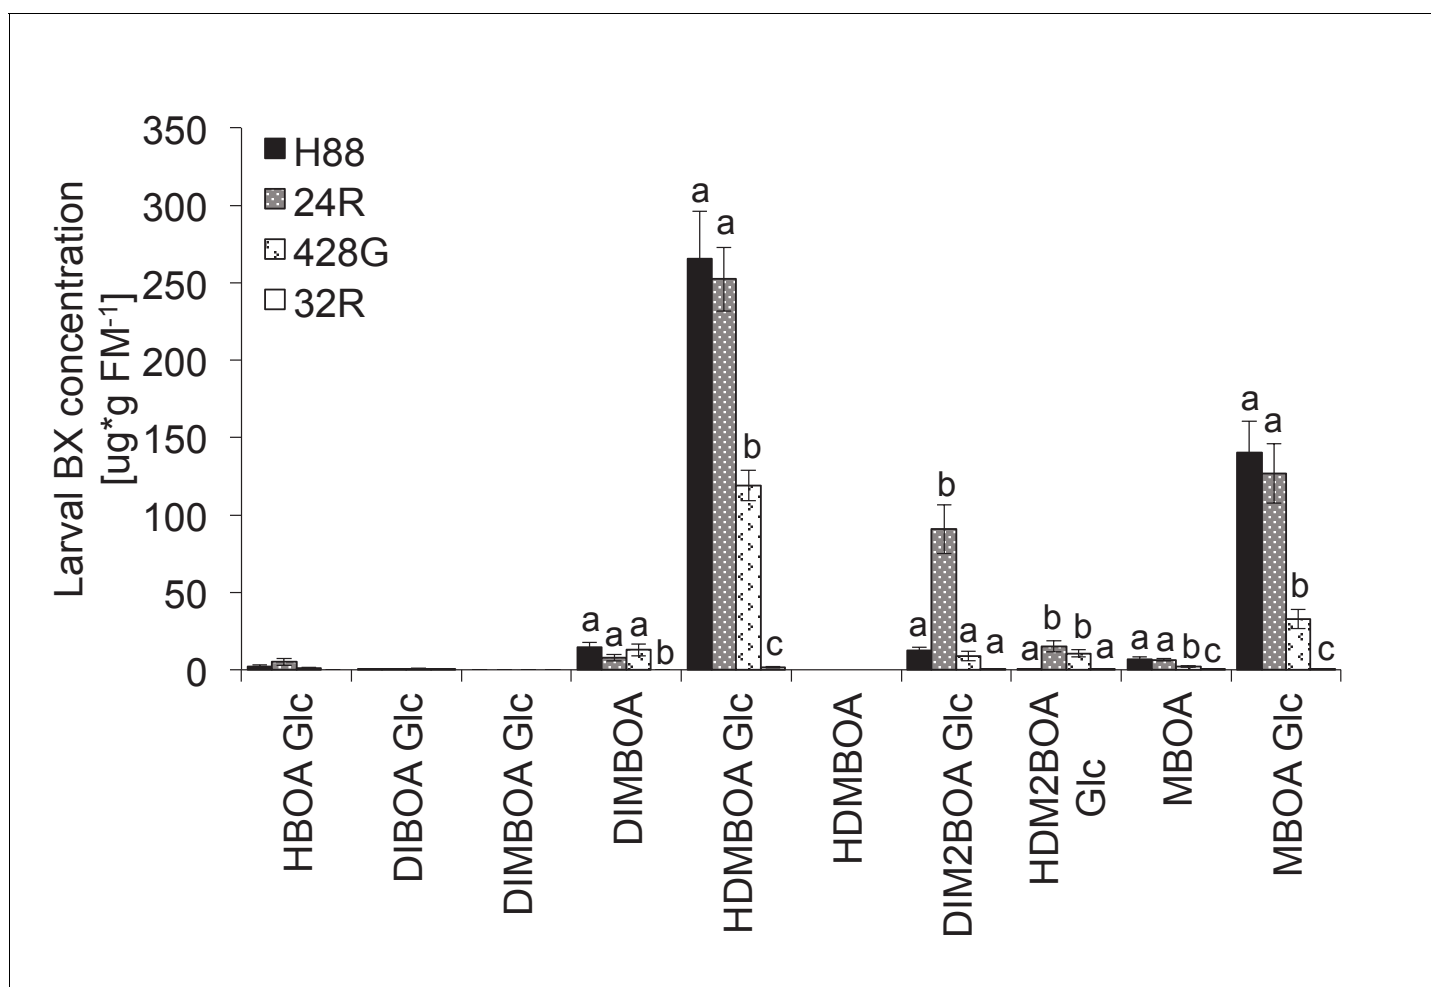

**Figure 1—figure supplement 1.** Benzoxazinoid levels in *Diabrotica virgifera* larvae fed on different maize lines. H88 corresponds to the wild type, 428G to the original *bx1* mutant, 24R to an *igl* mutant and 32R to a 100% BX-deficient *bx1.igl* double mutant (see [29]). Means  $\pm$  SE are shown. Letters indicate significant differences between genotypes (one-way ANOVAs,  $p < 0.05$ ). No BXs were detected in larvae fed on 32R.

DOI: <https://doi.org/10.7554/eLife.29307.004>

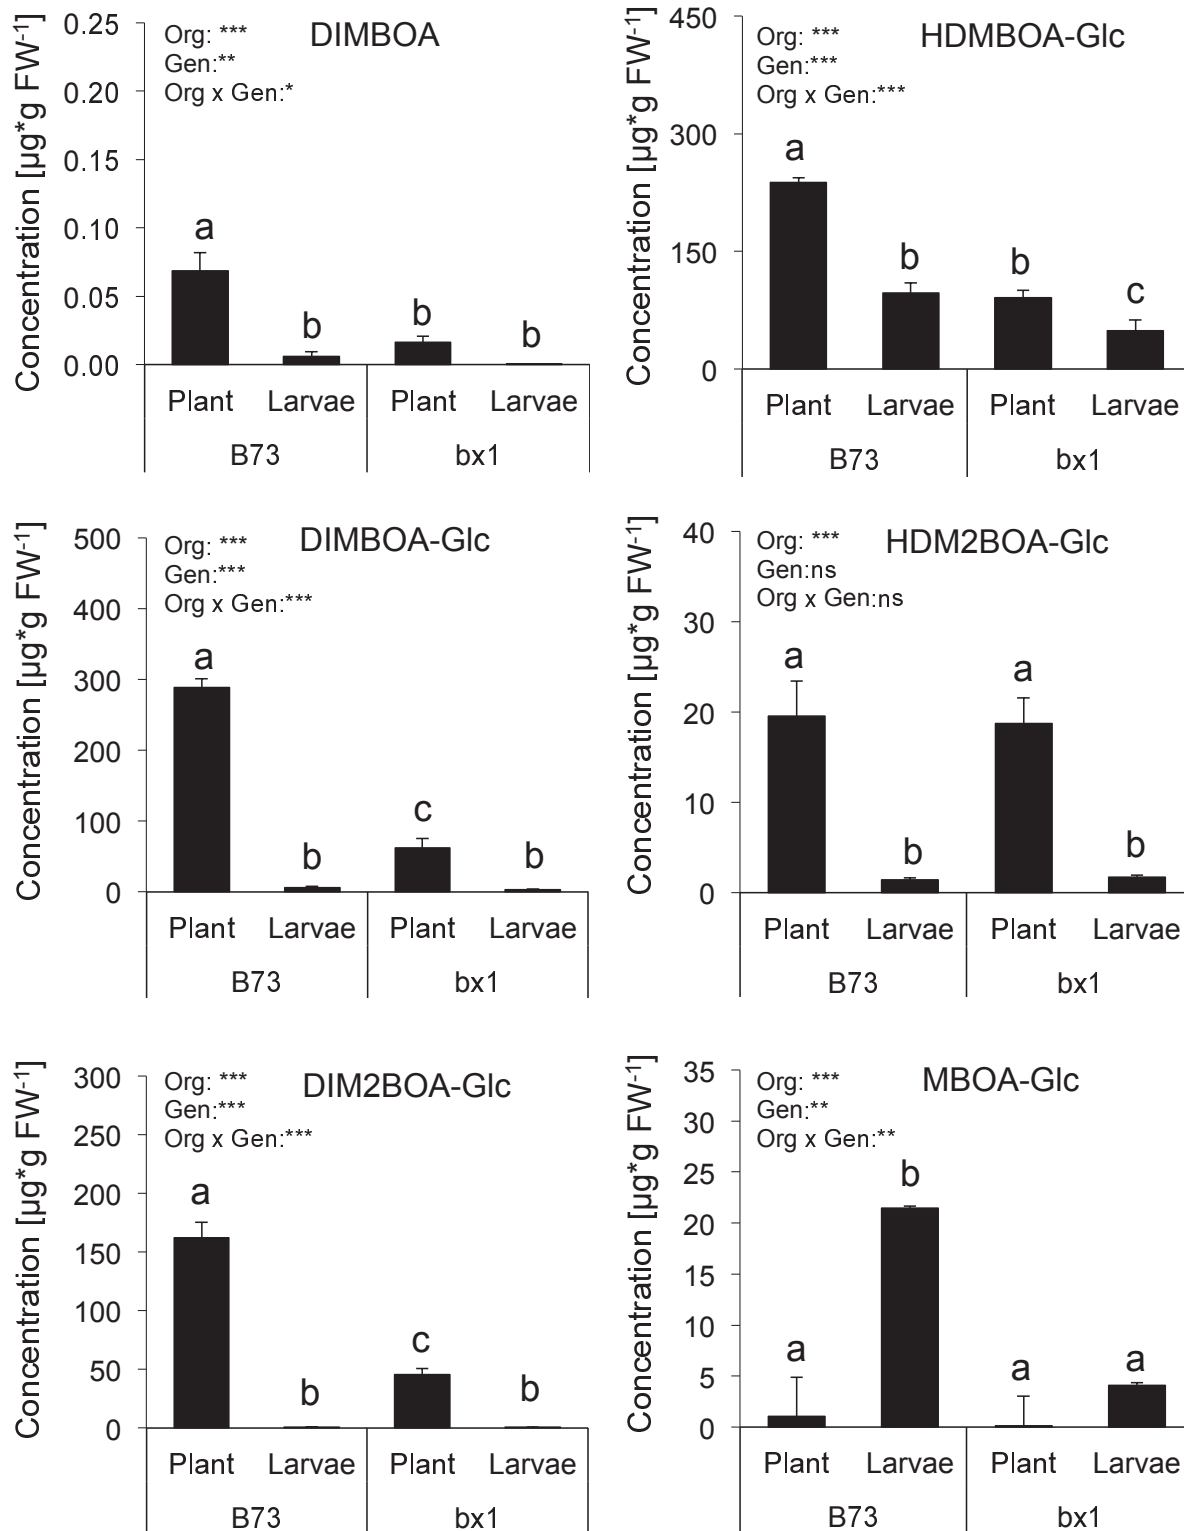

**Figure 1—figure supplement 2.** Benzoxazinoid levels in *Diabrotica virgifera* larvae fed wild-type (B73) and *bx1* (*bx1*:B73) mutant plants. Means  $\pm$  SE are shown. Results of two-way ANOVAs are shown (\* $p < 0.05$ , \*\* $p < 0.01$ , \*\*\* $p < 0.001$ ). Letters indicate significant differences between genotypes (post-hoc test,  $p < 0.05$ ).

DOI: <https://doi.org/10.7554/eLife.29307.005>

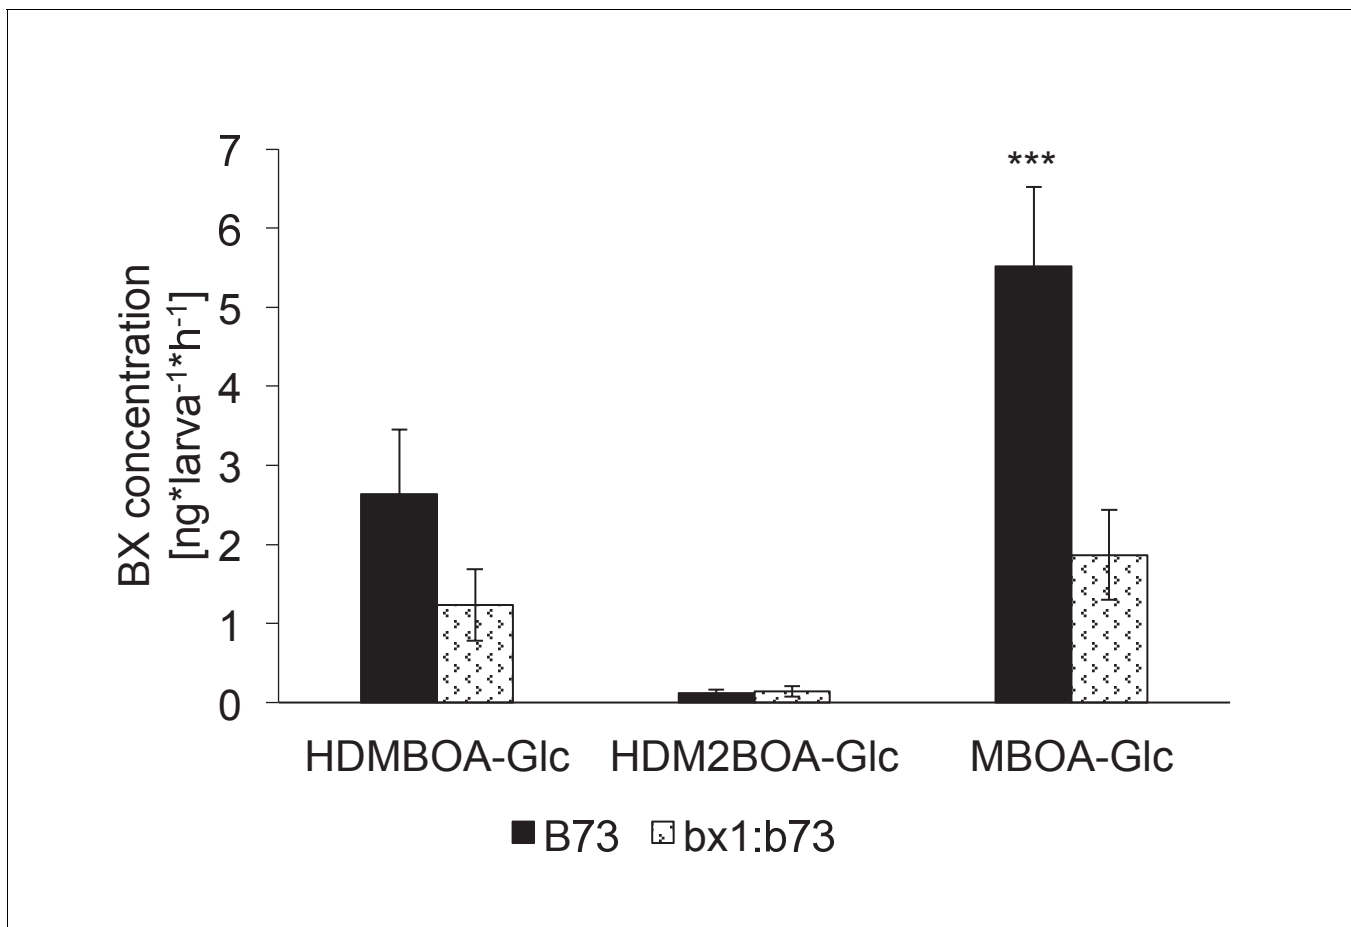

**Figure 1—figure supplement 3.** Benzoxazinoid levels in aqueous surface extracts of *Diabrotica virgifera* larvae fed on wild-type (B73) and *bx1* (*bx1:b73*) mutant plants. Means  $\pm$  SE are shown. Stars indicate significant differences between genotypes (Student t-test,  $p < 0.001$ ).

DOI: <https://doi.org/10.7554/eLife.29307.006>

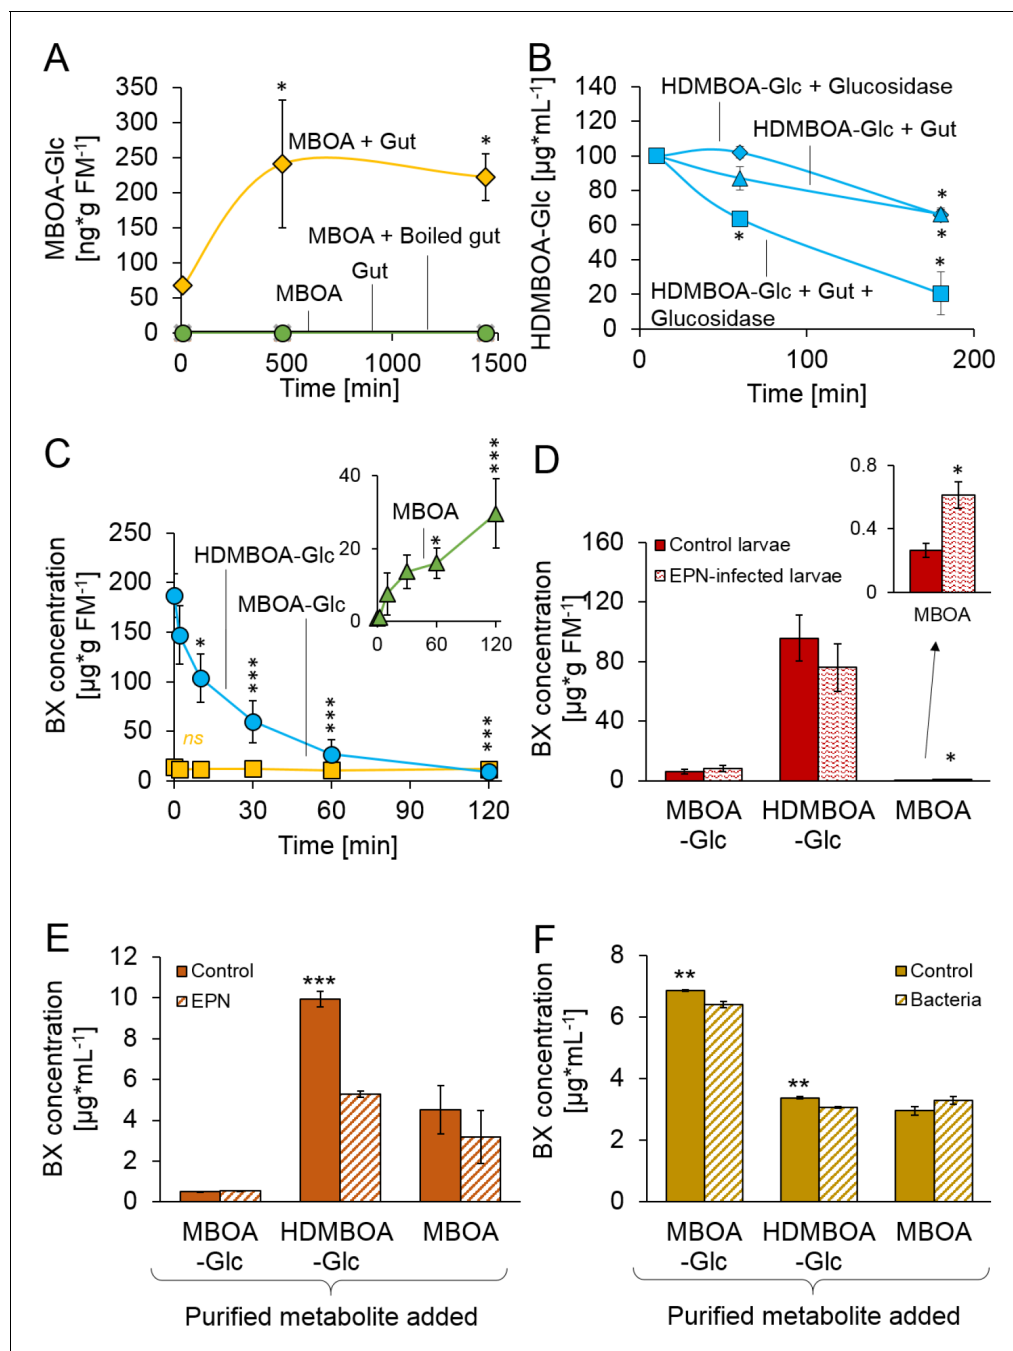

**Figure 2.** Stabilization and reactivation of stored benzoxazinoids (BXs) by *Diabrotica virgifera* and its natural enemies (Figure 2—figure supplement 1). (A) Stabilization of MBOA by conversion to MBOA-Glc in *D. virgifera* gut extracts. (B) HDMBOA-Glc deglycosylation in *D. virgifera* gut extracts. (C) BX reactivation in *D. virgifera* larvae upon mechanical tissue disruption. (D) BX reactivation in *D. virgifera* larvae upon exposure to the entomopathogenic nematode (EPN) *Heterorhabditis bacteriophora*. (E) BX reactivation by *H. bacteriophora* 24 hr after addition of purified metabolites. (F) BX reactivation by the EPN endosymbiotic bacterium *Photorhabdus luminescens* 24 hr after addition of purified metabolites. Means  $\pm$  SE are shown. Stars indicate significant differences between time points (repeated measures ANOVAs, A–C) or between treatments (Student's t-tests, D–F; \* $p < 0.05$ , \*\* $p < 0.01$ , \*\*\* $p < 0.001$ ). Raw data are available in Figure 2—source data 1.

DOI: <https://doi.org/10.7554/eLife.29307.008>

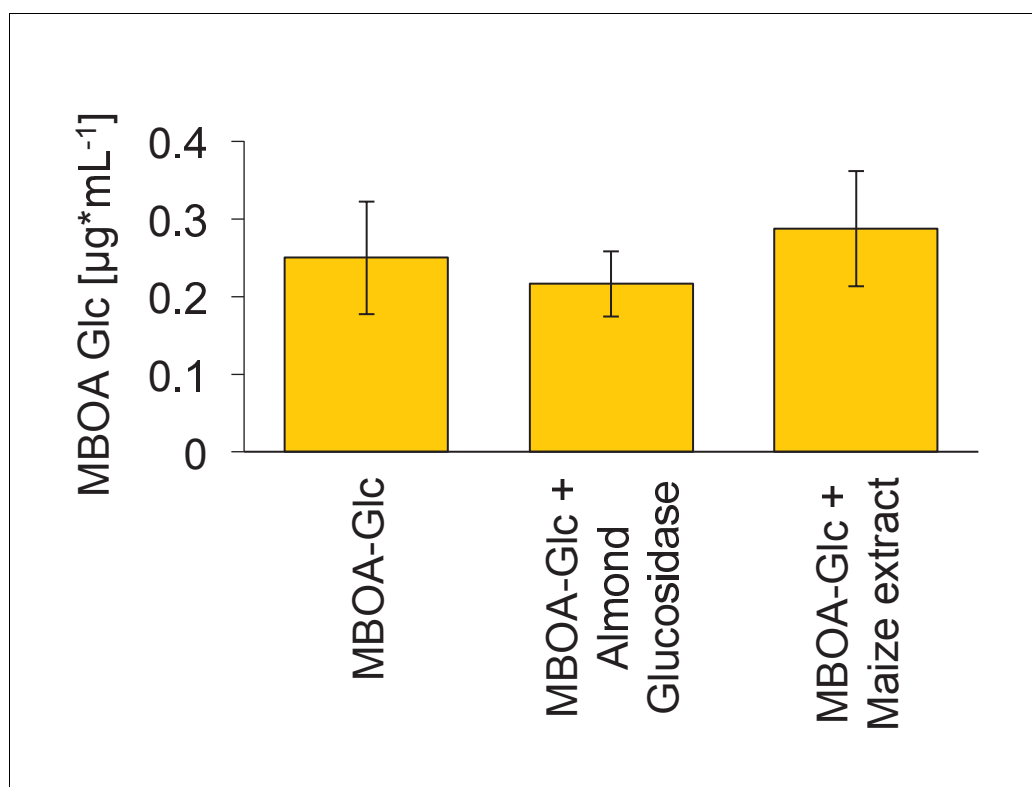

**Figure 2—figure supplement 1.** Degradation of MBOA-Glc by plant-derived hydrolases. MBOA-Glc concentrations upon incubation with a broad-spectrum almond glucosidase (CAS Nr. 9001-22-3) and with root extracts of a benzoxazinoid-free maize seedling (32R). Means  $\pm$  SE are shown. No significant change in MBOA-Glc was observed (one-way ANOVA).

DOI: <https://doi.org/10.7554/eLife.29307.009>



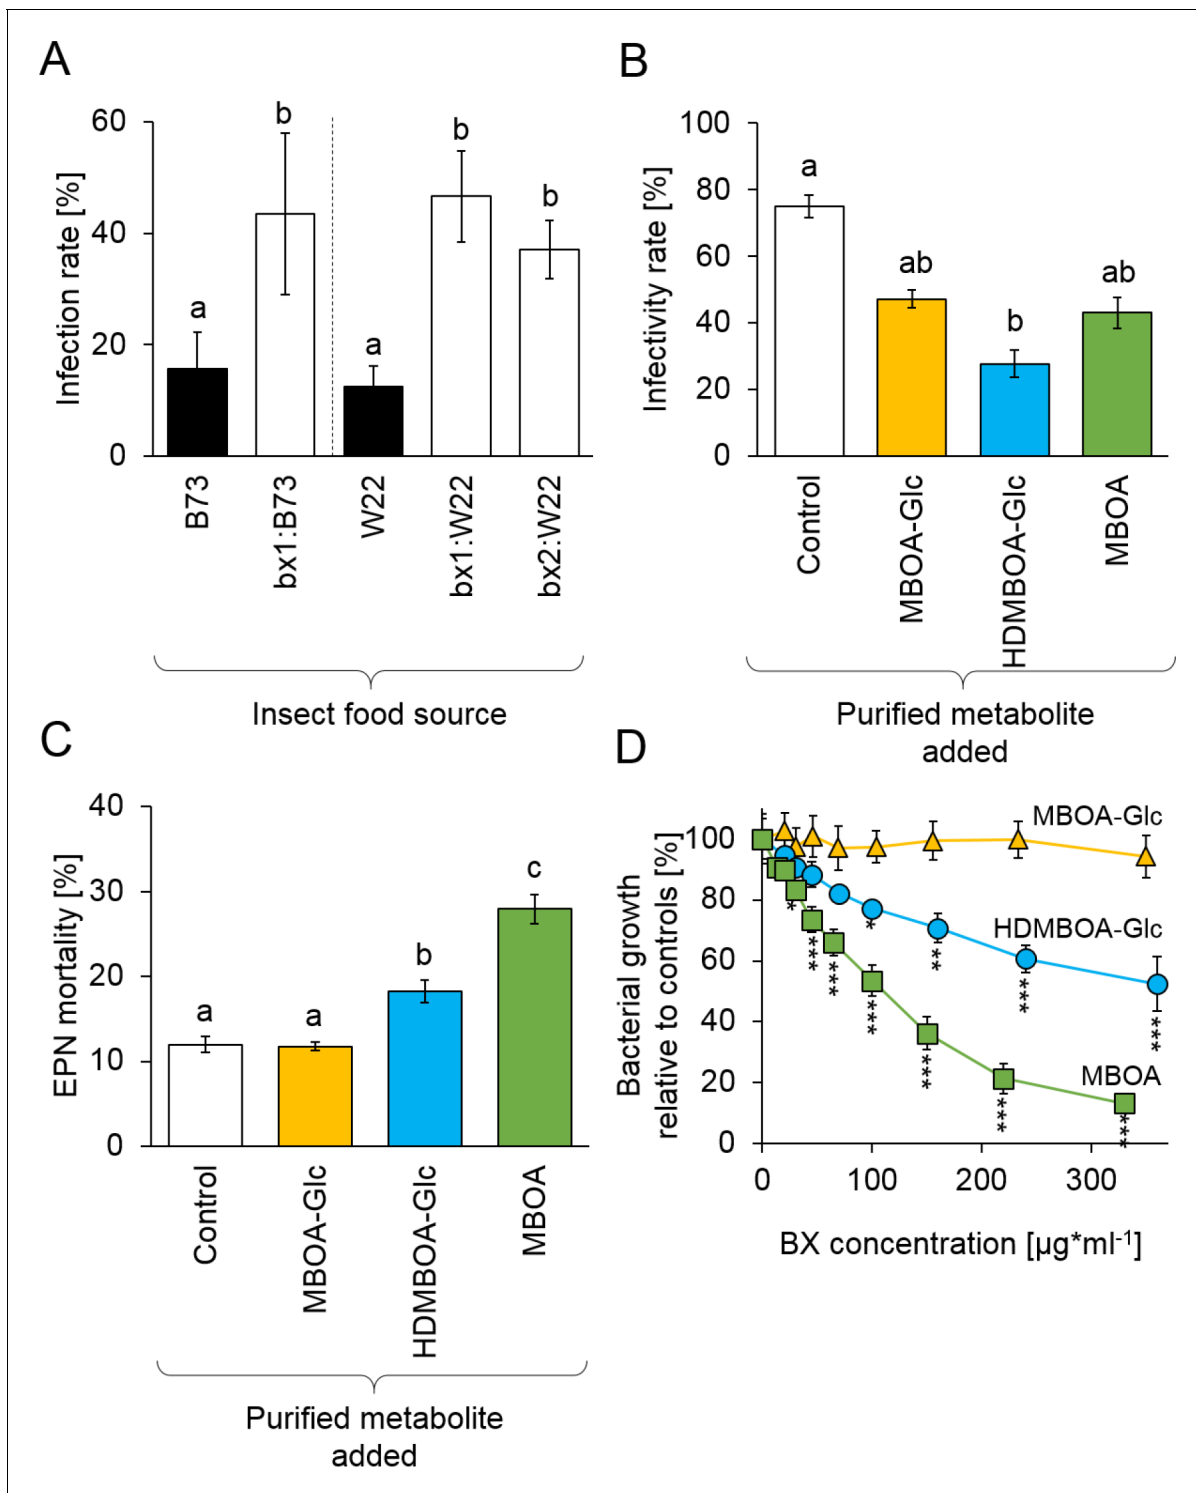

**Figure 3.** Benzoxazinoids (BXs) protect *Diabrotica virgifera* from its natural enemies (**Figure 3—figure supplement 1**). (A) Infection success by the entomopathogenic nematode (EPN) *Heterorhabditis bacteriophora* on *D. virgifera* larvae fed on WT (B73 and W22) or BX-deficient (bx1:B73, bx1:W22, bx2:W22) plants. (B) Effect of 7 days exposure to BXs on *H. bacteriophora* infectivity. (C) Effect of 7 days exposure to BXs on *H. bacteriophora* mortality. (D) Effect of BXs on the growth of the symbiotic entomopathogenic bacterium *Photorhabdus luminescens*. Different letters indicate significant differences between plant genotypes. Means  $\pm$  SE are shown. Stars indicate significant differences between concentrations (A-C: one-way ANOVA, D: repeated measures ANOVA, \* $p < 0.05$ , \*\* $p < 0.01$ , \*\*\* $p < 0.001$ ). Raw data are available in **Figure 3—source data 1**.

DOI: <https://doi.org/10.7554/eLife.29307.011>

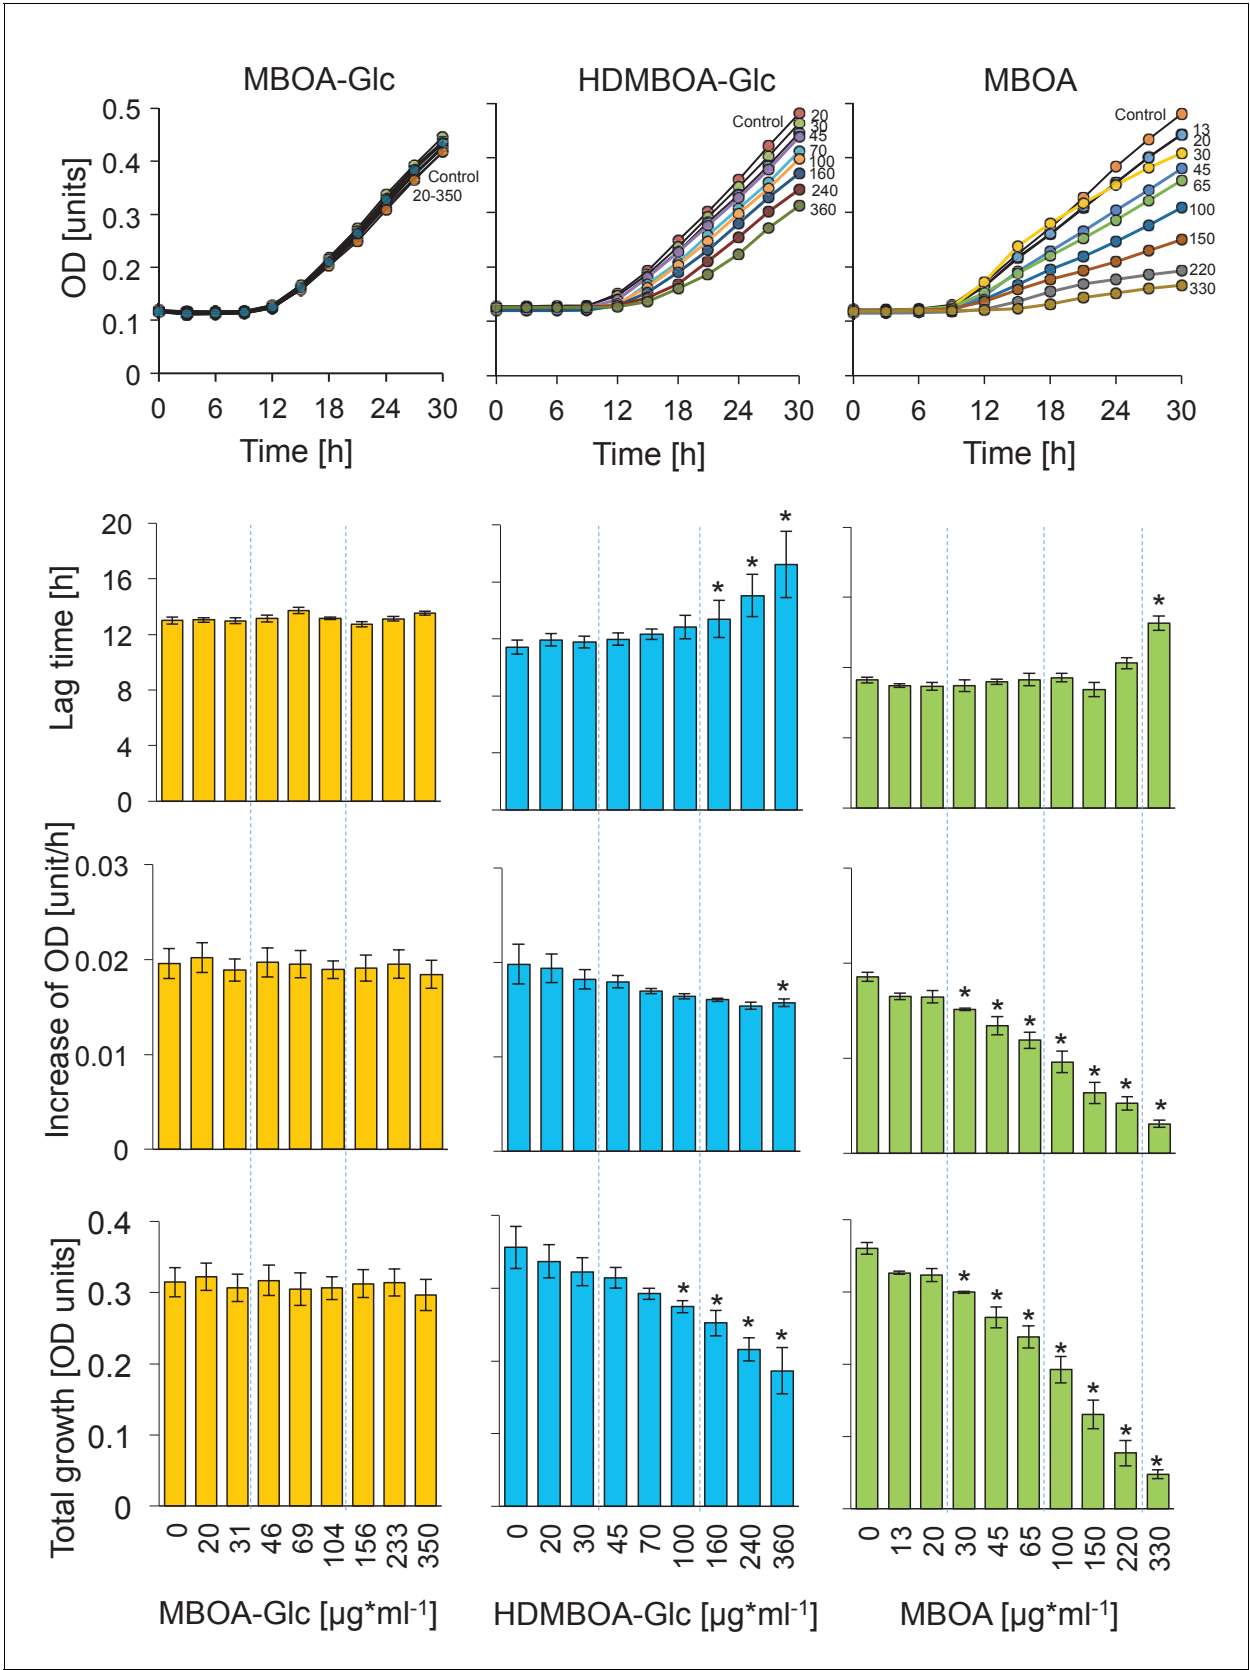

**Figure 3—figure supplement 1.** Growth curves and growth characteristics of *Photorhabdus luminescens* EN01 upon exposure to MBOA-Glc, HDMBOA-Glc and MBOA at different concentrations. Means  $\pm$  SE are shown. Stars indicate significant differences between genotypes (repeated measures ANOVAs,  $p < 0.05$ ).

DOI: <https://doi.org/10.7554/eLife.29307.012>

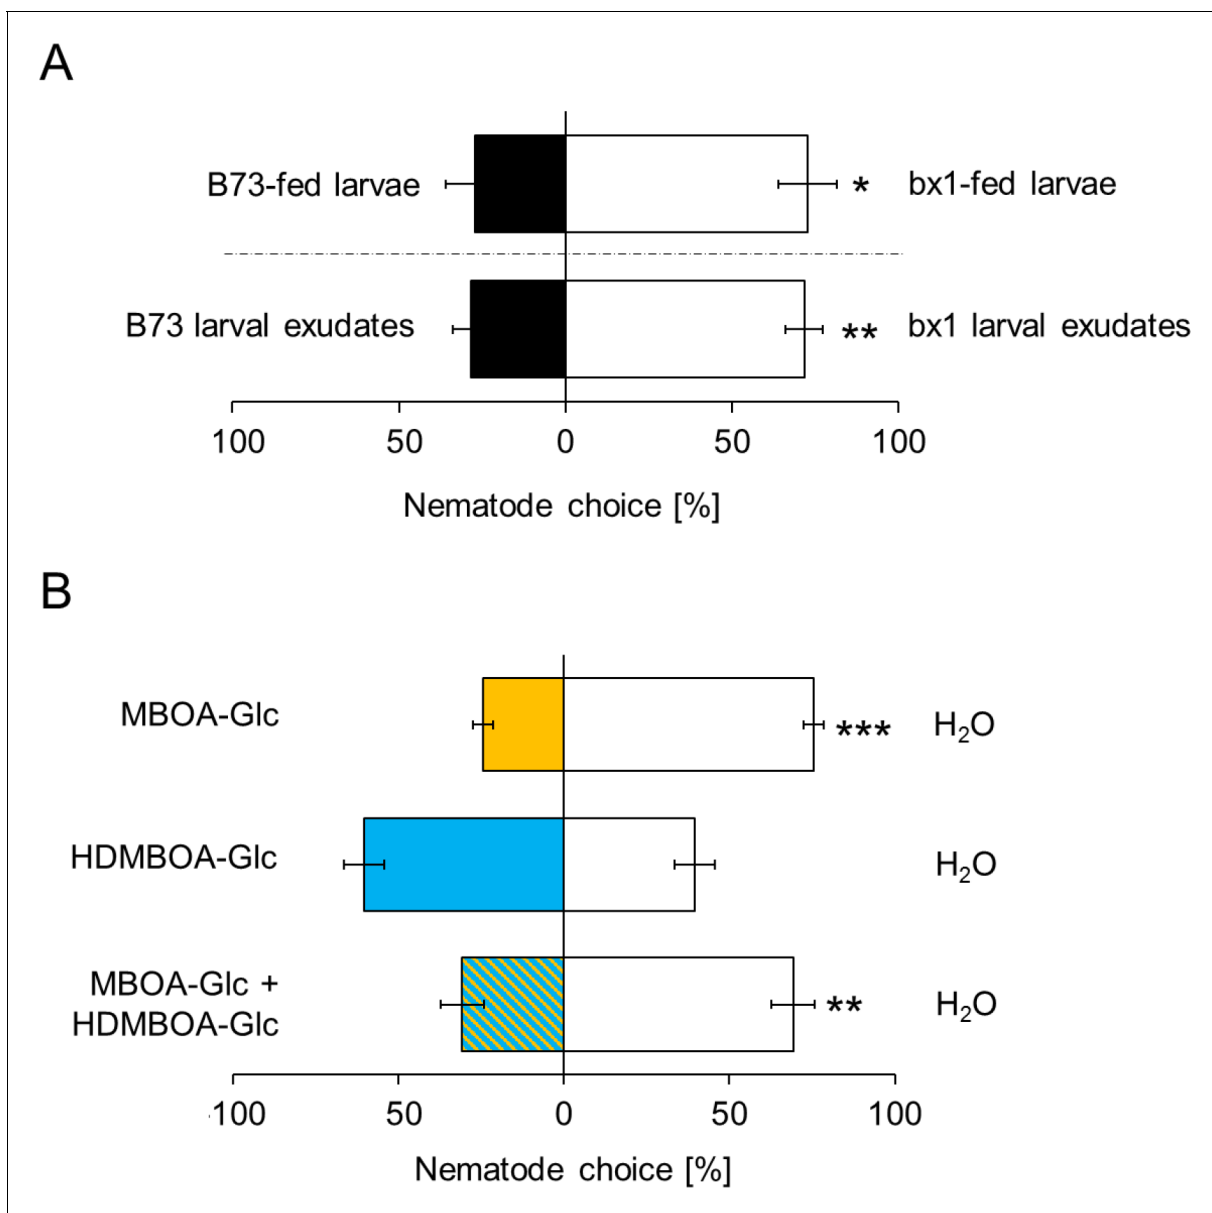

**Figure 4.** MBOA-Glc decreases the attractiveness of *Diabrotica virgifera* larvae. (A) Attraction of the entomopathogenic nematode (EPN) *Heterorhabditis bacteriophora* to *D. virgifera* larvae fed on wild-type (B73) and *bx1*-mutant (*bx1*:B73) (top) and aqueous surface extracts of larvae fed on wild type and *bx1*-mutant (bottom). (B) *H. bacteriophora* attraction to pure MBOA-Glc and HDMBOA-Glc at physiological concentrations. Means  $\pm$  SE are shown. Letters indicate significant differences between treatments (one sample t-tests, \* $p$ <0.05, \*\* $p$ <0.01, \*\*\* $p$ <0.001). Raw data are available in [Figure 4—source data 1](#).

DOI: <https://doi.org/10.7554/eLife.29307.014>

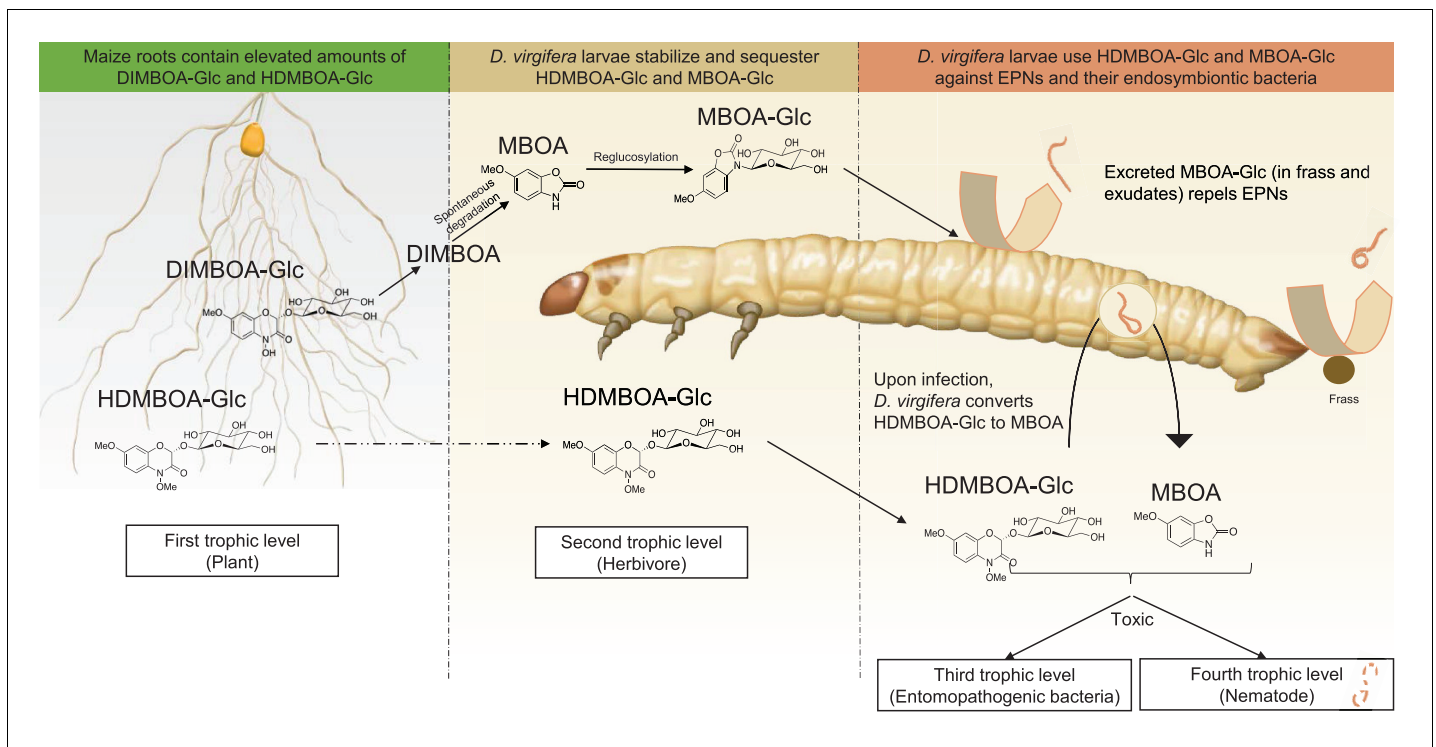

**Figure 5.** A model illustrating how BX sequestration and activation of plant toxins protects *Diabrotica virgifera* larvae from their enemies at multiple levels. MBOA-Glc, released in the frass and on the exoskeleton, repels infective juvenile entomopathogenic nematodes. Upon infection by nematodes and their symbiotic entomopathogenic bacteria, HDMBOA-Glc is activated to produce MBOA. Both HDMBOA-Glc and the activated MBOA reduce the growth of the symbiotic bacteria and kill EPNs.

DOI: <https://doi.org/10.7554/eLife.29307.016>
